# Supplementary material for: A microRNA profile associated with Opisthorchis viverrini-induced cholangiocarcinoma in tissue and plasma
Source: Springer Nature journal article supplement (doi:10.1186/s12885-015-1270-5), 2015-04-22
Supplement: MOESM3 [file 9744324]

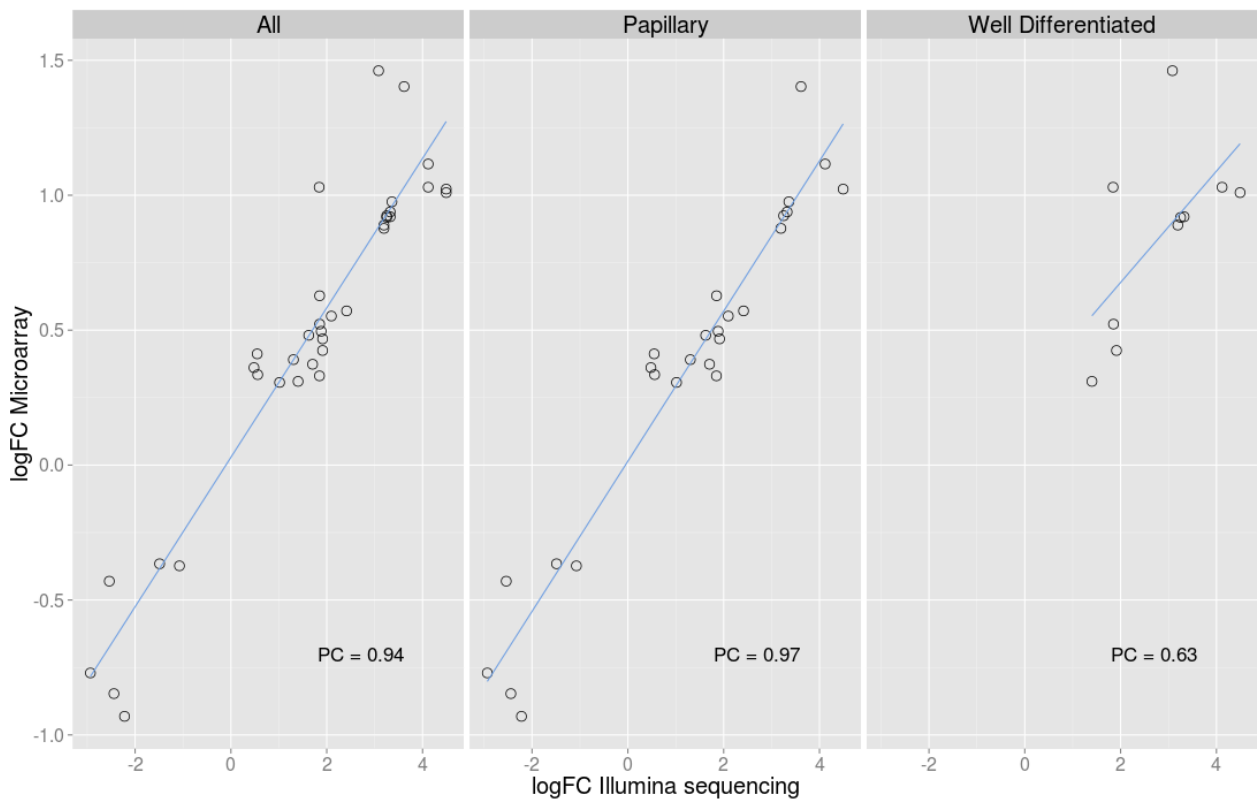

**Supplementary Figure 1:** Regression analysis comparing fold change (FC) values from miRNAs identified as significantly dysregulated in microarray analysis to FC values from RNA-Seq analysis of the same tissue. When all samples were compared to their matched D-NT tissue FC values were strongly correlated (Pearson's correlation of 0.94; PC on graph). Similarly, when analyses were broken into comparisons between samples of the same histological grade, strong correlation was observed in the FC values obtained using both methods.
